# Supplementary material
Source: publisher site journal article supplement (https://study.sagepub.com/sites/default/files/20%20Bloomberg%203e%20Appendix%20DD.pdf)
Supplement: Supplementary file 1 [file 20%20Bloomberg%203e%20Appendix%20DD.pdf]

## Appendix DD. Sample Analytic Category Development Tool

| Research Question                                                                                                                            | Finding Statement                                                                                                                                                             | Outcome/<br>Consequence<br>(Research Problem)                                                                  | Analytic<br>Category                                                                  |
|----------------------------------------------------------------------------------------------------------------------------------------------|-------------------------------------------------------------------------------------------------------------------------------------------------------------------------------|----------------------------------------------------------------------------------------------------------------|---------------------------------------------------------------------------------------|
| 1. On completing course work, to what extent do participants perceive that they are prepared to conduct research and write the dissertation? | <b>Finding 1:</b><br>A majority of participants indicated that course work did not adequately prepare them to conduct research and write a dissertation.                      | Students remained ABD because of the gap that existed between course work and dissertation work.               | <b>Category 1:</b><br>Acknowledging the gap between course work and dissertation work |
| 2. What do participants perceive they needed to learn in order to complete their dissertation?                                               | <b>Finding 2:</b><br>All participants expressed the need to know the content and process involved in conducting research and writing a dissertation.                          | 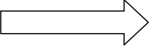                             |                                                                                       |
| 3. How do participants attempt to develop the knowledge, skills, and attitudes they perceive are necessary to complete a dissertation?       | <b>Finding 3:</b><br>The majority of participants attempted to learn by reaching out to colleagues and others through informal means.                                         | The content-process gap could be closed through self-directed learning and other informal learning strategies. | <b>Category 2:</b><br>Closing the content-process gap                                 |
| 4. What factors do participants perceive might assist them in completing their dissertation?                                                 | <b>Finding 4:</b><br>The majority of participants indicated that they were self-reliant. More than half indicated that colleagues were instrumental in facilitating progress. |                              |                                                                                       |
| 5. What factors do participants perceive have impeded their progress in working toward completing their dissertation?                        | <b>Finding 5:</b><br>The majority of participants cited lack of timely and consistent advisement as a barrier to progress.                                                    | Support pertaining to dissertation-related obstacles was lacking.                                              | <b>Category 3:</b><br>Leveraging dissertation support                                 |

Source: This tool appears in Bloomberg, L. D. (2010). *Understanding qualitative research: Content and process* (Part II). Unpublished manuscript.
